# Supplementary material for: Targeting Amino Acid Metabolic Reprogramming via L-Type Amino Acid Transporter 1 (LAT1) for Endocrine-Resistant Breast Cancer
Source: MDPI journal article supplement (doi:10.3390/cancers13174375), 2021-08-30
Supplement: s1 [file s1]

Fig. 4(a) (LAT1)

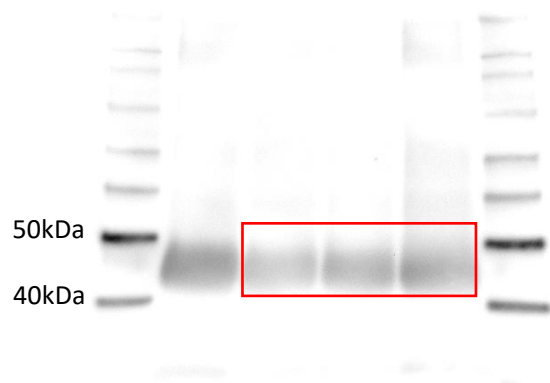

Fig. 4(a) ( $\beta$ -actin)\*

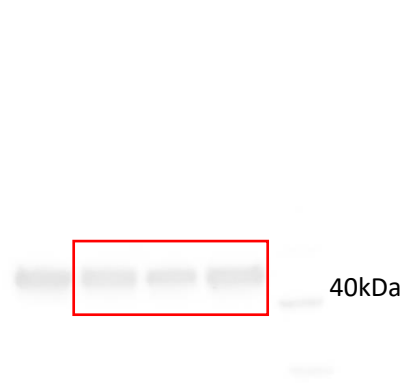

Fig. 4(b) (LAT3)

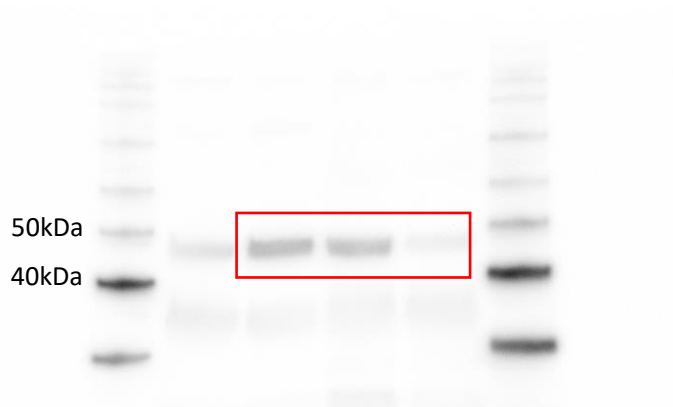

Fig. 4(b) ( $\beta$ -actin)\*\*

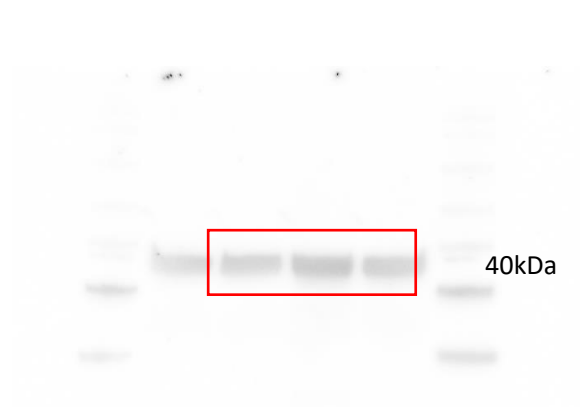

\*  $\beta$ -actin is the same sample of LAT1.

\*\*  $\beta$ -actin is the same membrane of LAT3 that was washed and reprobbed.
